# Supplementary material
Source: PubMed Central journal article supplement (PMC3189077)
Supplement: 1110406108_pnas.201110406SI.pdf [file 1110406108_pnas.201110406SI.pdf]

# Supporting Information

Kim et al. 10.1073/pnas.1110406108

## SI Materials and Methods

**Plant Materials and Growth Conditions.** RNAi-C1 (1), which targets the four cytosolic *Arabidopsis* HSP90 genes, was crossed into a *CCR2:LUC*<sup>+</sup> reporter background (2). F1 seedlings exhibiting kanamycin (RNAi-C1, 50 μg/mL) and gentamycin (*CCR2:LUC*<sup>+</sup>, 50 μg/mL) resistance were selected, and antibiotic resistant F2 progeny were scored phenotypically at the adult stage for bushy growth, an indicator of HSP90 reduction (1). *TOC1-YFP* (*TMG*) (3) and the *PRR:PRRn-GFP* transformants have been described previously (4). *gi-2* (5), *gi-201* (6), *GI:GI-TAP* (7), and *35S:GI-OX* (8) have been described previously. All plant materials were grown under 12 h white fluorescent light (50–60 μmol m<sup>-2</sup> s<sup>-1</sup>)/12 h dark cycles (LD) for 8–12 d on MS media (Murashige and Skoog; GIBCO) plates with 3% sucrose and 0.8% agar, as previously described (9).

HSP90.1, 2, and 4 artificial microRNA (amiRNA) plasmids were generated using pAmiR-HSP90.1 (CSHL\_078887), pAmiR-HSP90.2 (CSHL\_079907), and pAmiR-HSP90.4 (CSHL\_079899), which were obtained from ABRC. HSP90.1–4 and HSP90.3 amiRNA plasmids were generated using Web MicroRNA Designer 2 (<http://wmd2.weigelworld.org>). Primers for HSP90.1–4 and HSP90–3 amiRNA were specified using Web MicroRNA Designer 3 oligo design algorithm initiated using the RS300 vector sequence and the following core amiRNA sequences of the target genes (or common gene family) to generate each specific amiRNA (HSP90.1–4: TTAGAAAGCAGCGTACTCTTC; HSP90.3: TCT-CCCGAAAGTGTGGGTC). Overlapping PCR and subsequent subcloning was performed as described previously (10). The amiRNA primers used are described in Table S5.

Seedlings for luminescence rhythm analysis were grown and period estimates determined as previously described (9) unless otherwise noted.

For period determination experiments using geldanamycin (GDA), seedlings were grown on MS agar media in LD for 5–7 d and transferred at ZT 0.5 to 24-well tissue culture plates (BD Falcon) filled with water containing 0.3 mM luciferin (Biotium) and either 0.02% DMSO (vehicle control) or 2 μM GDA. Plates were then transferred to constant red light (17 μmol m<sup>-2</sup> s<sup>-1</sup>) for the duration of the experiment and imaged every 2 h. For protein expression experiments, 7- to 10-d-old LD-grown seedlings (MS agar media) were harvested at ZT 4, and remaining seedlings were then incubated in 0.05% DMSO (vehicle control) or 5 μM GDA in water-filled Petri dishes (60 × 15 mm) and harvested at the indicated times while a second addition of 5 μM GDA (or DMSO) was administered at ZT 14.

**Protein Analysis.** Protein extraction and immunoblot detections were performed as described previously (8). For immunoprecipitation of ZTL and coimmunoprecipitation of HSP90, anti-ZTL polyclonal antibody was preincubated with protein A agarose (Invitrogen) at 4 °C, after which protein extracts were incubated for 1 h with gentle rotation. Immune complexes were washed three times, resuspended in SDS/PAGE sample buffer, briefly heated, and subjected to SDS/PAGE and following immunoblotting. For HSP90 immunoblotting, protein was transferred to PVDF membrane (Bio-Rad) and incubated with the affinity-purified anti-HSP90 antibody (1:1,000) for 4 h at room temperature or overnight at 4 °C. The membranes were developed using peroxidase-conjugated secondary antibody (1:3,000–5,000) (GE Healthcare) by enhanced chemiluminescence (SuperSignal West Pico Chemiluminescent substrate; Pierce Biotechnology).

Ten-day-old *Arabidopsis* whole seedlings grown under 12 h light/12 h dark condition on MS plates or *Nicotiana benthamiana* leaves 3 d after agroinfiltration were subjected to in vivo protein cross-linking as previously described (11).

The ORF of *Arabidopsis* Hsp90.2 (AtHsp90.2, At5g56030) and ZTL (At5g57360) was introduced into pET28a and pMal c2X to produce recombinant protein with 6xHis tag and maltose-binding protein (MBP-ZTL), respectively. The plasmids were transformed into *Escherichia coli* BL21 (DE3) pLysS for protein expression. *E. coli* cells harboring the plasmid were grown at 30 °C until OD600 approached 0.8. Protein expression was induced by the addition of 0.5 mM (His-AtHsp90.2) and 1 mM (MBP-ZTL) isopropyl-1-thio-β-D-galactopyranoside for another 3 h at 37 °C, and the cells then were harvested by centrifugation. The harvested cells were resuspended in PBS and disrupted by sonication. After centrifugation, the resulting supernatant of His-AtHsp90.2 and MBP-ZTL was applied onto a Ni-NTA Sepharose CL-6B affinity column (Peptron) and Amylose resin (New England Biolabs), respectively. AtHsp90.2 protein was eluted by thrombin digestion (16 h/4 °C) and MBP-ZTL eluted using 10 mM maltose in PBS. For buffer exchanges, the eluted proteins were subjected to gel filtration chromatography with elution buffer (50 mM Hepes, pH 7.5) by using an AKTA fast performance liquid chromatography system with a prepacked Superdex 200 HR 10/30 column (Amersham). Protein concentration was determined using a Bio-Rad protein assay. The chaperone activity of AtHsp90.2 was assayed by measuring its capacity to suppress aggregation of MBP-ZTL. Purified recombinant MBP-ZTL using affinity column chromatography was incubated with 10 mM DTT at room temperature for 1 h and then purified by PD-10 column (GE Healthcare) to remove remaining DTT in buffer. Reduced ZTL was confirmed by SDS/PAGE, and the fourth elution of MBP-ZTL (1 μM) was applied in the absence or presence of AtHsp90.2 with various molar ratios for holdase chaperone assay under denaturing conditions (26.6 mM Gn-HCl and 45 °C) for 20 min by measuring the absorbance at 340 nm using a Beckman DU-800 spectrophotometer (Beckman Coulter) attached to a thermostatic cell holder assembly. BSA was used as a negative control.

**PCR Techniques.** RT-PCR was performed using conditions and sequences as previously described (4). Ubiquitin 10 (*UBQ10*, AT4g05320) was used as a control for semiquantitative RT-PCR analysis. For RT-PCR analysis using protoplasts, 800 μL of protoplasts were used for transfection using 200 μg of amiR-control, amiR-HSP90.1–4, or mixture of amiR-HSP90.1, 90.2, 90.3, 90.4 (50 μg per each amiRNA). Protoplasts were harvested at ZT 4 after 19 h incubation in the entraining chamber after transfection. RNA extraction and real-time quantitative PCR (qPCR) was performed as previously described (10). RT-PCR primers used are described in Table S5.

**Luminescence Assay.** Protoplast isolation and DNA transfection was performed as previously described with minor modifications (10). Briefly, protoplasts were isolated at ZT 4 from 25-d-old *Arabidopsis* rosette leaves grown in 12 h light/12 h dark. Extracted protoplasts were resuspended in W5 solution [154 mM NaCl, 125 mM CaCl<sub>2</sub>, 5 mM KCl, 1.5 mM Mes-KOH (pH 5.7), and 5 mM glucose], at a concentration of 1.5 × 10<sup>5</sup> mL<sup>-1</sup>. DNA transfections were performed by mixing 200 μL protoplasts, 55 μg of amiRNA plasmids, and 16 μg of *CCA1:luciferase* reporter plasmids with PEG solution (40% PEG-4000, 200 mM mannitol, and 100 mM Ca[NO<sub>3</sub>]<sub>2</sub>). Transfected protoplasts (3 × 10<sup>4</sup>)

were transferred into a 96-well microplate and incubated from ZT 9 under constant red light condition. Image collection and quantitation were performed as described previously with minor modifications (12). Period lengths are reported as variance-weighted period  $\pm$  SEM, which were estimated using bioluminescence data obtained from 36 to 144 h under constant conditions.

**Yeast Two-Hybrid Interaction Assay.** The protein-coding sequence of *Arabidopsis* HSP90.2 and ZTL were cloned into the donor vector (pDONR-221) and subsequently moved into the bait (pDEST32) and prey (pDEST22) vectors using the recombination-based Gateway cloning system (Invitrogen) according to the manufacturer's instructions. The primer sets are

5'-AAAAAGCAGGCTTCATGGCGGACGCTGAAACCTT-3' and 5'-AGAAAGCTGGGTCGTCGACTTCCTCCATCTTGC-T-3' for HSP90.2, and 5'-AAAAAGCAGGCTTCATGGAGT-GGGACAGTGGTTC-3' and 5'-AGAAAGCTGGGTCGCTG-AGATAGCTCGCTAGTGA-3' for ZTL. Sets of constructs including empty vectors were cotransformed into a pJ694A yeast strain. Yeast transformants were selected on glucose-based synthetic minimal medium (SD; 0.67% yeast nitrogen base, 2% glucose, amino acids dropout solution) deficient in tryptophan and leucine either in the absence or presence of histidine. Quantitative yeast two-hybrid interaction assays ( $\beta$ -galactosidase assay) were performed using ortho-nitrophenyl- $\beta$ -D-galactopyranoside as a substrate according to published protocols (8).

1. Sangster TA, et al. (2007) Phenotypic diversity and altered environmental plasticity in *Arabidopsis thaliana* with reduced Hsp90 levels. *PLoS ONE* 2:e648.
2. Schultz TF, Kiyosue T, Yanovsky M, Wada M, Kay SA (2001) A role for LKP2 in the circadian clock of *Arabidopsis*. *Plant Cell* 13:2659–2670.
3. Más P, Kim WY, Somers DE, Kay SA (2003) Targeted degradation of TOC1 by ZTL modulates circadian function in *Arabidopsis thaliana*. *Nature* 426:567–570.
4. Fujiwara S, et al. (2008) Post-translational regulation of the *Arabidopsis* circadian clock through selective proteolysis and phosphorylation of pseudo-response regulator proteins. *J Biol Chem* 283:23073–23083.
5. Fowler S, et al. (1999) GIGANTEA: A circadian clock-controlled gene that regulates photoperiodic flowering in *Arabidopsis* and encodes a protein with several possible membrane-spanning domains. *EMBO J* 18:4679–4688.
6. Martin-Tryon EL, Kreps JA, Harmer SL (2007) GIGANTEA acts in blue light signaling and has biochemically separable roles in circadian clock and flowering time regulation. *Plant Physiol* 143:473–486.
7. David KM, Armbruster U, Tama N, Putterill J (2006) *Arabidopsis* GIGANTEA protein is post-transcriptionally regulated by light and dark. *FEBS Lett* 580:1193–1197.
8. Kim WY, et al. (2007) ZEITLUPE is a circadian photoreceptor stabilized by GIGANTEA in blue light. *Nature* 449:356–360.
9. Somers DE, Kim WY, Geng R (2004) The F-box protein ZEITLUPE confers dosage-dependent control on the circadian clock, photomorphogenesis, and flowering time. *Plant Cell* 16:769–782.
10. Kim J, Somers DE (2010) Rapid assessment of gene function in the circadian clock using artificial microRNA in *Arabidopsis* mesophyll protoplasts. *Plant Physiol* 154: 611–621.
11. Rohila JS, Chen M, Cerny R, Fromm ME (2004) Improved tandem affinity purification tag and methods for isolation of protein heterocomplexes from plants. *Plant J* 38: 172–181.
12. Kim J, Kim Y, Yeom M, Kim JH, Nam HG (2008) FIONA1 is essential for regulating period length in the *Arabidopsis* circadian clock. *Plant Cell* 20:307–319.

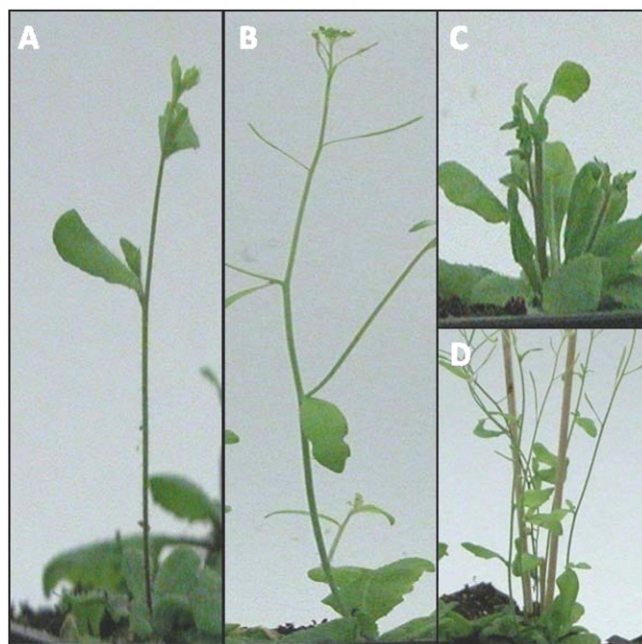

**Fig. S1.** Examples of altered morphologies observed in RNAi-C HSP90-reduced plants. Plants were grown in long days (16 h light/8 h dark) until flowering. Single inflorescences were observed in WT (A) and RNAi-C line 41 (B). Multiple inflorescences were observed in lines 83 (C) and 19 (D).

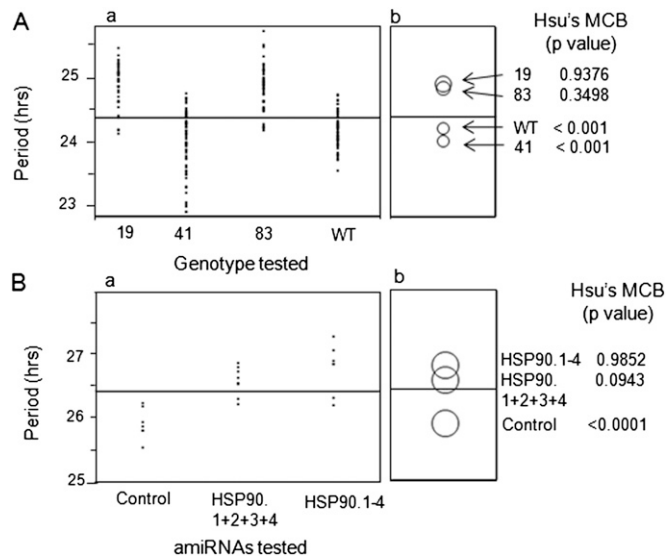

**Fig. S2.** Scatter plots of individual periods from RNAi and amiRNA trials. (A) Individual period values of each of four lines (RNAi-C and WT) from fast Fourier transform nonlinear least squares (FFT-NLLS) analyses are plotted in *a*. The *x* axis indicates the lines tested, and the *y* axis is the period range, which is shared with *b*. (B) Individual period values of each well of protoplasts transfected transiently with the indicated amiRNA plasmids from FFT-NLLS analyses are plotted in *a*. The *x* axis indicates the amiRNA plasmid(s) tested, and the *y* axis is the period range, which is shared with *b*. The diameter of the circles in the vertical direction are the 95% confidence interval of period values in each instance calculated by Hsu's multiple comparison with the best (Hsu's MCB). Corresponding Hsu's MCB results are summarized by *P* value. The *P* value in the analysis represents the probability that the period estimation of each individual line does not significantly overlap with the best one based on family or pooled error rate ( $\alpha = 0.05$ ). The horizontal lines in *A* and *B* indicate the grand mean for each data set.

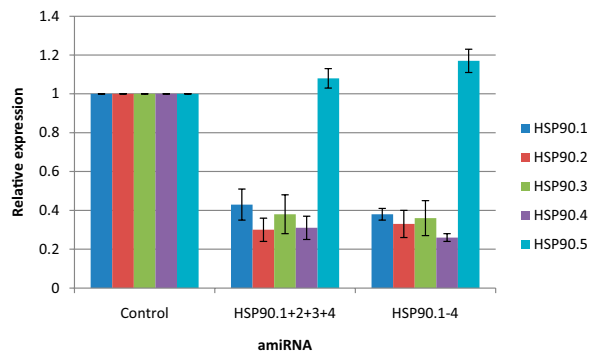

**Fig. S3.** amiRNA to cytosolic HSP90 reduces expression of the target HSP90 genes. Relative expression of four cytosolic HSP90 and HSP90.5 genes from cDNA of protoplast transfected with control amiRNA, amiR-HSP90.1–4, or amiR-HSP90.1+2+3+4. Protoplast was harvested at ZT 4, after 19 h of incubation after transfection. Expression levels were determined by real-time qPCR and normalized to *ACT1N2* (*ACT2*). Data represent mean  $\pm$  SEM ( $n = 4$ ).











**Table S3. Summary of HSP90 amiRNA core sequences and relationships to potential target gene(s)**

| amiRNA         | amiRNA core sequence (5'→3')     | amiRNA source* | Potential target gene(s) | Target recognition sequence (3'→5') <sup>†,‡</sup> | Hybridization energy (kcal/mol) <sup>§</sup> | Perfect-match-dG cutoff (70%) <sup>  </sup> (%) |
|----------------|----------------------------------|----------------|--------------------------|----------------------------------------------------|----------------------------------------------|-------------------------------------------------|
| amiR-HSP90.1-4 | TTAGAAAGCAGCGT<br>ACTCTTC        | W2             | <i>HSP90.1</i>           | <u>GTAGAAAGCAGCATACTCTTC</u>                       | -40.06                                       | 94.04                                           |
|                |                                  |                | <i>HSP90.2</i>           | <u>GTAGAAAGCAGCGTACTCCTC</u>                       | -41.76                                       | 98.03                                           |
|                |                                  |                | <i>HSP90.3</i>           | <u>GTAGAAAGCAGCGTACTCCTC</u>                       | -41.76                                       | 98.03                                           |
|                |                                  |                | <i>HSP90.4</i>           | <u>GTAGAAAGCAGCGTACTCCTC</u>                       | -41.76                                       | 98.03                                           |
|                |                                  |                | <i>HSP90.5</i>           | <u>GTAGAAAGCAGCGTACTCCTC</u>                       | -25.58                                       | 60.05                                           |
|                |                                  |                | <i>HSP90.6</i>           | <u>GTAGAAAGCAGCGTACTCCTC</u>                       | -12.34                                       | 28.97                                           |
|                |                                  |                | <i>HSP90.7</i>           | <u>GTAGAAAGCAGCGTACTCCTC</u>                       | -23.07                                       | 54.15                                           |
| amiR-HSP90.1   | GATTAAGTAGTCACAAT<br>GTTCCGAGATT | A              | <i>HSP90.1</i>           | <u>CTAGAAGTAGTCACAATGTTCAAGTAA</u>                 | -38.60                                       | 75.33                                           |
|                |                                  |                | <i>HSP90.2</i>           | TCAG— <u>AG-AAATATCTTCACAACA</u>                   | -14.75                                       | 28.79                                           |
|                |                                  |                | <i>HSP90.3</i>           | TCAG— <u>AGAAAAAATCTTCACGA-A</u>                   | -13.86                                       | 27.05                                           |
|                |                                  |                | <i>HSP90.4</i>           | TCAG— <u>AG-AAAAAGCTTCAAGATA</u>                   | -14.71                                       | 28.71                                           |
|                |                                  |                | <i>HSP90.5</i>           | TGGATAAATCTCGTTCACGCGTGATTT                        | -13.50                                       | 26.35                                           |
|                |                                  |                | <i>HSP90.6</i>           | <u>CAATCAATTATAATCTCTC-CAACAT</u>                  | -14.65                                       | 28.59                                           |
|                |                                  |                | <i>HSP90.7</i>           | <u>ACATAATCCATCAAAAAGCTTAATT</u>                   | -12.70                                       | 24.79                                           |
| amiR-HSP90.2   | ACATTACCTTTCACA<br>AATCCGAGCTAC  | A              | <i>HSP90.2</i>           | <u>ACAATACCTTTCACAAATCCGAGGTAC</u>                 | -44.28                                       | 79.81                                           |
|                |                                  |                | <i>HSP90.1</i>           | <u>ACAACACCTTTCACAAAGCTGAGGTAC</u>                 | -31.22                                       | 56.27                                           |
|                |                                  |                | <i>HSP90.3</i>           | <u>ACAATACCTTTCACAAACCCAAGGTAC</u>                 | -33.95                                       | 61.19                                           |
|                |                                  |                | <i>HSP90.4</i>           | <u>ACGATACCTTTCACAAACCCAAGGTAA</u>                 | -29.57                                       | 53.30                                           |
|                |                                  |                | <i>HSP90.5</i>           | <u>ACAACACCTTTCACAAAGCTCAGATAT</u>                 | -24.33                                       | 43.85                                           |
|                |                                  |                | <i>HSP90.6</i>           | <u>ACAACACCTTTCACAAAGCTCAAGTAC</u>                 | -25.37                                       | 45.73                                           |
|                |                                  |                | <i>HSP90.7</i>           | <u>ACAAGACCTTTCACAAAGCTCAATAC</u>                  | -22.31                                       | 40.21                                           |
| amiR-HSP90.3   | TCTCCCGAAAGTGTG<br>GGGTC         | W2             | <i>HSP90.3</i>           | <u>GCTCCCGAAAGTGTGGGCTC</u>                        | -42.59                                       | 85.69                                           |
|                |                                  |                | <i>HSP90.1</i>           | <u>AGCAGCAAAGTGTTCGGTTC</u>                        | -20.56                                       | 44.34                                           |
|                |                                  |                | <i>HSP90.2</i>           | <u>GCTCCCGAAAGTGTGGGCTC</u>                        | -27.67                                       | 55.67                                           |
|                |                                  |                | <i>HSP90.4</i>           | <u>GCTCCCGAAAGTGTGGGCTC</u>                        | -32.71                                       | 65.81                                           |
|                |                                  |                | <i>HSP90.5</i>           | <u>GTTCCCGAGCTCGCCGGGCT</u>                        | -25.70                                       | 43.85                                           |
|                |                                  |                | <i>HSP90.6</i>           | <u>CCCACCCAGCTCTGCTGGATT</u>                       | -19.84                                       | 45.73                                           |
|                |                                  |                | <i>HSP90.7</i>           | <u>GGCAGCAAAGTGTGGGCTC</u>                         | -17.20                                       | 40.21                                           |
| amiR-HSP90.4   | GGTTACCGTAAAAGAT<br>CCACGCGCCTG  | A              | <i>HSP90.4</i>           | <u>GGTACCGTAAAAGATCCACCGGCCTG</u>                  | -55.26                                       | 84.90                                           |
|                |                                  |                | <i>HSP90.1</i>           | <u>AGTGACAGTGAAGGAACCACCGCTTG</u>                  | -24.74                                       | 38.01                                           |
|                |                                  |                | <i>HSP90.2</i>           | <u>GGTACAGTGAAGATCCCCGGCCTG</u>                    | -47.30                                       | 72.67                                           |
|                |                                  |                | <i>HSP90.3</i>           | <u>GGTGACGGTGAAGATCCACCGGCCTG</u>                  | -43.66                                       | 67.08                                           |
|                |                                  |                | <i>HSP90.5</i>           | TCTGATCAGATACGAGCTACTATCGGCAAC                     | N.A.                                         | N.A.                                            |
|                |                                  |                | <i>HSP90.6</i>           | CTGAATGGTAAAAGCTTGAATTTGCTTC                       | N.A.                                         | N.A.                                            |
|                |                                  |                | <i>HSP90.7</i>           | <u>GGAAACAGCAAATTTAC—CGTTAGCCTT</u>                | N.A.                                         | N.A.                                            |

N.A., not applicable.

\*A, From ABRC; W2, Designed using the WMD2 (Web microRNA designer2).

<sup>†</sup>Matched sequences between amiRNA and target sequence are underlined.

<sup>‡</sup>Recognition region of the best candidate target of amiRNA was found using the WMD2 program, and that of other genes was chosen with their homologous region to the recognition region of the best candidate target.

<sup>§</sup>Hybridization of amiRNA to its mRNA target site was calculated using the RNAcofold program in the WMD2 Web site.

<sup>||</sup>Ratio of the hybridization energy between amiRNA and its target to that between amiRNA and its perfect reverse complement in percent.

**Table S4. Summary of the effects of HSP90 knockdown approaches on circadian period: Transient amiRNA**

| amiRNA transfected | amiRNA target(s)            | n | Mean | SEM  | P value (MCB) |
|--------------------|-----------------------------|---|------|------|---------------|
| Control            | None                        | 8 | 25.9 | 0.08 | <0.0001       |
| One construct      | Cytosolic HSP90s            | 8 | 26.9 | 0.10 | 0.9852        |
| Four constructs    | Individual cytosolic HSP90s | 8 | 26.6 | 0.07 | 0.0943        |

Transient transfection of *CCA1:LUC* alone (no construct) or *CCA1:LUC* plus one amiRNA plasmid targeting the four cytosolic HSP90 genes, or plus four amiRNA plasmids targeting four individual genes. Pools of protoplasts of each type were assayed in microtitre wells (n = 8). MCB, multiple comparisons with the best.
